# Supplementary material for: Web-Based Self-Assessment Health Tools: Who Are the Users and What Is the Impact of Missing Input Information?
Source: PubMed Central journal article supplement (PMC4211033; doi:10.2196/jmir.3146), 2014-09-26
Supplement: jmir_v16i9e215_app2.pdf [file jmir_v16i9e215_app2.pdf]

$\frac{1}{2} \frac{d}{dt} \int_{\mathbb{R}^n} |u|^2 dx$

Women  $\geq 60$  years:

$\frac{1}{2} \frac{d}{dt} \int_{\mathbb{R}^n} |u|^2 dx$



## ALTERNATIVE ALGORITHM #2 (TC, SBP, BMI known, HDL unknown)

→ **Calculate 10-year CVD Risk:**

*Men on Antihypertensive Rx:*

$$\frac{1}{P} \left[ \frac{1}{1 - \frac{1}{P}} \left( \frac{1}{1 - \frac{1}{P}} \right)^{\frac{1}{P}} \right]$$

*Men not on Antihypertensive Rx:*

$$\frac{1}{P} \left[ \frac{1}{1 - \frac{1}{P}} \left( \frac{1}{1 - \frac{1}{P}} \right)^{\frac{1}{P}} \right]$$

*Women on Antihypertensive Rx:*

$$\frac{1}{P} \left[ \frac{1}{1 - \frac{1}{P}} \left( \frac{1}{1 - \frac{1}{P}} \right)^{\frac{1}{P}} \right]$$

*Women not on Antihypertensive Rx:*

$$\frac{1}{P} \left[ \frac{1}{1 - \frac{1}{P}} \left( \frac{1}{1 - \frac{1}{P}} \right)^{\frac{1}{P}} \right]$$

→ **Calculate Heart Age:**

*Men < 60 years:*

$$\frac{1}{P} \left[ \frac{1}{1 - \frac{1}{P}} \left( \frac{1}{1 - \frac{1}{P}} \right)^{\frac{1}{P}} \right]$$

*Men ≥ 60 years:*

$$\frac{1}{P} \left[ \frac{1}{1 - \frac{1}{P}} \left( \frac{1}{1 - \frac{1}{P}} \right)^{\frac{1}{P}} \right]$$

*Women < 60 years:*

$$\frac{1}{P} \left[ \frac{1}{1 - \frac{1}{P}} \left( \frac{1}{1 - \frac{1}{P}} \right)^{\frac{1}{P}} \right]$$

*Women ≥ 60 years:*

$$\frac{1}{P} \left[ \frac{1}{1 - \frac{1}{P}} \left( \frac{1}{1 - \frac{1}{P}} \right)^{\frac{1}{P}} \right]$$

*note. In 2013 the reference value for TC was increased to 200 to increase the sensitivity*
